# Supplementary material
Source: Springer Nature journal article supplement (https://www.springermedizin.de/resource/supplementary/13058_2011_2962_MOESM3_ESM.pdf/9702926)

**A****3rd Week**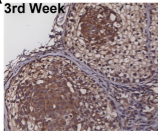**20X****3rd Week**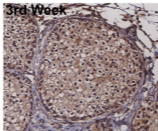**20X****3 Week**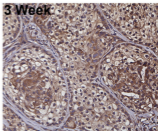**20X****B****3rd Week**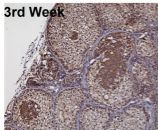**10X****5th Week**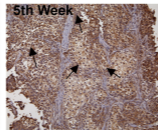**10X****7th Week**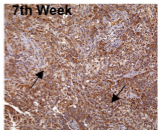**10X**

Supplement: MOESM3 [file 9702926]
